# Supplementary material for: High-Content, Image-Based Screening for Drug Targets in Yeast
Source: PLoS One. 2010 Apr 14;5(4):e10177. doi: 10.1371/journal.pone.0010177 (PMC2854693; doi:10.1371/journal.pone.0010177)
Supplement: Table S1 — A list of parameters identified from hydroxyurea-treated cells using Jonckheere-Terpstra tests at FDR = 0.01. Green, red, and blue in the ‘ID’ column indicate parameters that were calculated from images of the cell wall, actin, and DNA, respectively. Red and green in the ‘P value’ column indicate increases and decreases, respectively, in the parameter values following hydroxyurea treatment with a given FDR from the Jonckheere-Terpstra test. All 501 parameters were described previously. A) A list of parameters detected at stage A (unbudded cells with one nucleus). B) A list of parameters detected at stage A1B (budded cells with one nucleus). C) A list of parameters detected at stage C (budded cells with two nuclei). D) A list of parameters representing various cellular ratios. (0.06 MB XLS) [file pone.0010177.s001.xls]

## Sheet: Table S1A
NAME	P value	Description	Morphological feature
C11-1_A	1.93657e-08	Whole cell size	Increase of cell size
C12-1_A	1.46696e-08	Whole cell outline length
C103_A	8.36161e-09	Long axis length in whole cell
C104_A	5.7522e-08	Short axis length in whole cell
CCV104_A	9.76149e-05	Coefficient of variation of C104 A
C13_A	0.00147627	Whole cell fitness for ellipse	Increase of cells with elongated bud
C115_A	9.76149e-05	Whole cell axis ratio
CCV115_A	0.00597727	Coefficient of variation of C115 A
C126_A	8.00486e-05	Brightness difference of cell wall	Increase of homogeneity of cell wall thickness
C127_A	0.00135544	Thickness difference of cell wall
ACV122_A	0.00444611	Coefficient of variation of A122 A	Increase of heterogenity of number of actin patches
D14-1_A	4.56222e-07	Nuclear size	Increase of nuclear size
D176_A	7.48851e-07	Nuclear long axis length
D179_A	1.64894e-07	Nuclear short axis length
D15-1_A	1.27148e-07	Nuclear brightness
D188_A	0.000368347	Distance between nuclear gravity center and brightest point
D173_A	1.96482e-06	Maximal distance between nuclear gravity center and nuclear outline
D102_A	5.7522e-08	Distance between nuclear gravity center and mother tip	Increase of distance between nuclear and cell tip
DCV102_A	0.00690863	Coefficient of variation of D102 A
DCV105_A	0.0010569	Coefficient of variation of D105 A
D127_A	3.35246e-08	Distance between nuclear brightest point and cell tip
DCV127_A	0.00382246	Coefficient of variation of D127 A
D117_A	7.48851e-07	Distance between nuclear gravity center and cell center	Increase of distance between nuclear and cell center
D135_A	2.4869e-06	Distance between nuclear brightest point and cell center
D147_A	0.000891394	Relative distance of nuclear gravity center to cell center
D148_A	0.00125044	Relative distance of nuclear brightest point to cell center

## Sheet: Table S1B
NAME	P value	Description	Morphological feature
C101_A1B	4.39624e-08	Whole cell size	Increase of wholl cell size
C102_A1B	1.93657e-08	Whole cell outline length
CCV102_A1B	0.000254787	Coefficient of variation of C102 A1B
C109_A1B	4.56222e-07	Neck width
CCV113_A1B	0.00280744	Coefficient of variation of C113 A1B
C113_A1B	9.78244e-08	Distance between bud tip and mother long axis through middle point of neck
C11-1_A1B	1.54892e-06	Mother cell size	Increase of mother size
C12-1_A1B	5.85148e-07	Mother cell outline length
CCV103_A1B	0.000174718	Coefficient of variation of C103 A1B
C112_A1B	5.85148e-07	Distance between middle point of neck and mother center
C128_A1B	5.85148e-07	Distance between middle point of neck and mother hip
C103_A1B	7.5097e-08	Long axis length in mother
C11-2_A1B	1.10876e-08	Bud cell size	Increase of bud size
C12-2_A1B	1.46696e-08	Bud cell outline length
C104_A1B	6.24371e-06	Short axis length in mother
C107_A1B	4.39624e-08	Long axis length in bud
CCV110_A1B	0.00382246	Coefficient of variation of C110 A1B
C111_A1B	1.64894e-07	Distance between bud tip and mother short axis extension
C108_A1B	1.10876e-08	Short axis length in bud
C110_A1B	4.97656e-06	Distance between bud tip and mother long axis extension
C115_A1B	5.85148e-07	Mother axis ratio	Increase of cells with elongated mother
CCV115_A1B	1.21836e-06	Coefficient of variation of C115 A1B
C105_A1B	0.00125044	Neck position
CCV105_A1B	6.55008e-05	Coefficient of variation of C105 A1B
C117_A1B	2.4869e-06	Cell outline ratio	Increase of cells with large bud
C118_A1B	3.54916e-07	Cell size ratio
C123_A1B	3.95787e-06	Small bud ratio
C125_A1B	2.75495e-07	Large bud ratio
A7-2_A1B	1.10876e-08	Size of actin region in bud	Increase of cells with delocalized actin patches in bud
A8-2_A1B	7.48851e-07	Total brightness of actin region in bud
A9_A1B	0.00796836	Proportion of actin region at neck
ACV9_A1B	0.000750197	Coefficient of variation of A9 A1B
A104_A1B	0.00796836	Relative distance of actin patch center from neck in bud
A108_A1B	3.54916e-07	Actin d ratio
A107_A1B	0.000306681	Actin c ratio
A109_A1B	0.00597727	Actin e ratio
D14-3_A1B	9.76149e-05	Nuclear size	Increase of nuclear size
D15-3_A1B	4.35705e-05	Nuclear brightness
D178_A1B	0.00690863	Nuclear long axis length
DCV178_A1B	0.00173916	Coefficient of variation of D178 A1B
D181_A1B	9.7635e-06	Nuclear short axis length
D104_A1B	7.5097e-08	Distance between nuclear gravity center and mother tip	Increase of distance between nuclear and mother tip
D107_A1B	5.34802e-05	Ratio of D104 to C103
D129_A1B	1.27148e-07	Distance between nuclear brightest point and mother tip
D126_A1B	1.96482e-06	Distance between nuclear gravity center and mother hip
D142_A1B	2.75495e-07	Distance between nuclear brightest point and mother hip
D145_A1B	2.4869e-06	Distance between nuclear outline point D7 and mother hip
D118_A1B	1.21691e-05	Distance between nuclear gravity center and mother center	Increase of distance between nuclear and mother center
D136_A1B	7.81629e-06	Distance between nuclear brightest point and mother center
D147_A1B	0.000306681	Relative distance of nuclear gravity center to mother center
D148_A1B	0.00125044	Relative distance of nuclear brightest point to mother center
DCV148_A1B	0.000891394	Coefficient of variation of D148 A1B
D152_A1B	0.000891394	Mobility of nucleus in mother	Decrease of distance between nuclear and neck center
D114_A1B	5.34802e-05	Ratio of D110 to C128
D155_A1B	0.00796836	Angle between C1D2-1 and C1C1-2

## Sheet: Table S1C
NAME	P value	Description	Morphological feature
C101_C	1.10876e-08	Whole cell size	Increase of wholl cell size
C102_C	2.645e-09	Whole cell outline length
C109_C	1.21691e-05	Neck width
C113_C	9.78244e-08	Distance between bud tip and mother long axis through middle point of neck
C11-1_C	4.56222e-07	Mother cell size	Increase of mother size
C12-1_C	1.64894e-07	Mother cell outline length
C103_C	3.35246e-08	Long axis length in mother
CCV103_C	0.00280744	Coefficient of variation of C103 C
C104_C	9.7635e-06	Short axis length in mother
C112_C	4.56222e-07	Distance between middle point of neck and mother center
C128_C	7.5097e-08	Distance between middle point of neck and mother hip
CCV128_C	0.00147627	Coefficient of variation of C128 C
C11-2_C	2.645e-09	Bud cell size	Increase of bud size
C12-2_C	2.645e-09	Bud cell outline length
C107_C	2.645e-09	Long axis length in bud
C108_C	6.29181e-09	Short axis length in bud
C110_C	0.00125044	Distance between bud tip and mother long axis extension
C111_C	7.81629e-06	Distance between bud tip and mother short axis extension
C114_C	0.00239834	Bud axis ratio	Increase of cells with elongated mother
C115_C	9.56236e-07	Mother axis ratio
CCV115_C	9.76149e-05	Coefficient of variation of C115 C
CCV105_C	0.00382246	Coefficient of variation of C105 C
C117_C	6.55008e-05	Cell outline ratio	Increase of cells with large bud
C118_C	7.81629e-06	Cell size ratio
C125_C	0.00714433	Large bud ratio
A7-2_C	0.000750197	Size of actin region in bud	Increase of cells having delocalized actin patches in bud
A120_C	0.000368347	Total length of actin patch link
A121_C	0.000441459	Maximal distance between patches
D14-1_C	2.87308e-05	Nuclear size in mother	Increase of nuclear size in mother
D176_C	3.54197e-05	Nuclear long axis length in mother
D179_C	2.4869e-06	Nuclear short axis length in mother
D15-1_C	0.00173916	Nuclear brightness in mother
D173_C	0.000211217	Maximal distance between nuclear gravity center and nuclear outline in mother
D188_C	0.00516059	Distance between nuclear gravity center and brightest point in mother
D14-2_C	5.85148e-07	Nuclear size in bud	Increase of nuclear size in bud
D177_C	1.21836e-06	Nuclear long axis length in bud
DCV177_C	0.00516059	Coefficient of variation of D177 C
D180_C	6.55008e-05	Nuclear short axis length in bud
D15-2_C	0.0010569	Nuclear brightness in bud
D174_C	5.85148e-07	Maximal distance between nuclear gravity center and nuclear outline in bud
DCV174_C	0.00239834	Coefficient of variation of D174 C
D189_C	0.00444611	Distance between nuclear gravity center and brightest point in bud
D196_C	0.00382246	Maximal intensity of nuclear brightness divided by average in bud
D14-3_C	1.54892e-06	Nuclear size in whole cell	Increase of nuclear size in whole cell
D15-3_C	0.000118777	Nuclear brightness in whole cell
D183_C	0.00516059	Nuclear axis ratio in bud	Increase of cells with elongated nuclear
D17-1_C	0.00690863	Nuclear fitness for ellipse in mother
D17-2_C	0.000750197	Nuclear fitness for ellipse in bud
D106_C	0.0010569	Ratio of D103 to C103	Decrease of ratio of distance between nuclear and mother tip to long axis length in mother
D108_C	4.56222e-07	Distance between nuclear gravity center in mother and middle point of neck	nuclear to neck in mother
D130_C	5.85148e-07	Distance between nuclear brightest point in mother and middle point of neck
D143_C	3.14079e-06	Distance between nuclear outline point D6-1 in mother and middle point of neck
D194_C	0.00239834	Maximal intensity of nuclear brightness divided by average in whole cell
D109_C	1.64894e-07	Distance between nuclear gravity center in bud and middle point of neck	Increase of ditance between nuclear and neck in bud
D131_C	5.7522e-08	Distance between nuclear brightest point in bud and middle point of neck
D113_C	0.000630011	Ratio of D109 to C107
D144_C	7.48851e-07	Distance between nuclear outline point D6-2 in bud and middle point of neck
D153_C	0.00204451	Mobility of nucleus in bud
D116_C	1.93657e-08	Distance between two nuclear gravity centers	Increase of distance between two nuclei
D134_C	4.39624e-08	Distance between two nuclear brightest points
D185_C	3.53869e-09	Relative distance of two nuclear gravity centers to middle point of neck
D186_C	3.53869e-09	Relative distance of two nuclear brightest points to middle point of neck
D167_C	0.00327934	Angle between D2-1D2-2 and C4-1C4-2
D117_C	9.7635e-06	Distance between nuclear gravity center in mother and mother center	Increase of distance between nuclear and cell center in mother
D135_C	1.96482e-06	Distance between nuclear brightest point in mother and mother center
DCV135_C	0.00444611	Coefficient of variation of D135 C
D147_C	0.00204451	Relative distance of nuclear gravity center in mother to mother center
DCV147_C	0.00796836	Coefficient of variation of D147 C
D148_C	0.00125044	Relative distance of nuclear brightest point in mother to mother center
DCV148_C	0.000750197	Coefficient of variation of D148 C
D119_C	1.64894e-07	Distance between nuclear gravity center in bud and bud center	Increase of distance between nuclear to cell center in bud
DCV123_C	0.00796836	Coefficient of variation of D123 C
D137_C	5.85148e-07	Distance between nuclear brightest point in bud and bud center
D149_C	1.21691e-05	Relative distance of nuclear gravity center in bud to bud center
D150_C	6.55008e-05	Relative distance of nuclear brightest point in bud to bud center
D125_C	0.00516059	Distance between nuclear gravity center in mother and mother hip	Increase of distance between nuclear and hip in mother
DCV145_C	0.00796836	Coefficient of variation of D145 C
D123_C	0.00204451	Ratio of D121 to C107	Increase of distance between nuclear and cell tip in bud
D139_C	0.00280744	Distance between nuclear brightest point in bud and bud tip

## Sheet: Table S1D
NAME	P value	Description	Morphological feature
C119	7.81629e-06	no bud ratio	Accumulation of large bud cells
C121	0.00239834	medium bud ratio
C122	0.000253923	large bud ratio
C123	0.00516059	small bud ratio to budded cells
A108	1.27148e-07	actin d ratio	Accumulation of actin delocalized cells in bud
A112	0.00327934	actin bcd ratio
A117	9.56236e-07	actin d ratio to budded cells
A119	0.00327934	actin f ratio to budded cells
D199	9.7635e-06	nuclear A ratio	Accumulation of budded cells with mono nucleus
D200	3.54916e-07	nuclear A1 ratio
D207	8.00486e-05	nuclear A1 ratio to budded cells
D209	1.21691e-05	nuclear C ratio to budded cells
D210	9.7635e-06	nuclear A ratio to nuclear AA1BC cells
D211	3.54916e-07	nuclear A1 ratio to nuclear AA1BC cells
D214	8.00486e-05	nuclear A1 ratio to nuclear A1BC cells
D216	9.7635e-06	nuclear C ratio to nuclear A1BC cells
