# Supplementary material for: High-Content, Image-Based Screening for Drug Targets in Yeast
Source: PLoS One. 2010 Apr 14;5(4):e10177. doi: 10.1371/journal.pone.0010177 (PMC2854693; doi:10.1371/journal.pone.0010177)
Supplement: Table S2 — A list of GO terms enriched in the top 100 genes ranked by the high-content image-based profiling for hydroxyurea treatment. Of the 4718 genes, 4379 genes were associated to at least one GO term, in which 91 of top 100 genes ranked by high-content image-profiling for hydroxyurea were included. Using the GO term finder (see Materials and Methods), significant enrichment of 111 GO terms was detected at P<0.05 with the Bonferroni correction (Corrected P-value column) among the 91 genes from 4379 genes, and GO terms associated with 100 and fewer genes in the 4379 genes (Number of annotations in the 4718 genes column) were listed. (0.03 MB XLS) [file pone.0010177.s002.xls]

## Sheet: Sheet1
GOID	Category	GO term	Corrected P-value	Uncorrected P-value	FDR	Expected false positives	Number of annotations in the 91 genes	Number of annotated genes in the top 100 genes	Number of annotations in the 4379 genes	Number of annotated genes in the 4718 genes	Ratio of annotations	The genes annotated to the node
GO:0000827	Function	inositol 1,3,4,5,6-pentakisphosphate kinase activity	0.042293	0.000427202	0.1	0.1	2	91	2	4379	1	KCS1, ARG82
GO:0008440	Function	inositol trisphosphate 3-kinase activity	0.042293	0.000427202	0.05	0.1	2	91	2	4379	1	KCS1, ARG82
GO:0051766	Function	inositol trisphosphate kinase activity	0.042293	0.000427202	0.0333	0.1	2	91	2	4379	1	KCS1, ARG82
GO:0031390	Component	Ctf18 RFC-like complex	0.000946833	8.68654e-06	0	0	3	91	3	4379	1	CTF18, CTF8, DCC1
GO:0016586	Component	RSC complex	7.69293e-06	7.05773e-08	0	0	5	91	7	4379	0.714286	RSC2, TAF14, LDB7, HTL1, NPL6
GO:0006337	Process	nucleosome disassembly	7.66414e-05	1.85124e-07	0	0	5	91	8	4379	0.625	ASF1, RSC2, LDB7, HTL1, NPL6
GO:0031498	Process	chromatin disassembly	7.66414e-05	1.85124e-07	0	0	5	91	8	4379	0.625	ASF1, RSC2, LDB7, HTL1, NPL6
GO:0032986	Process	protein-DNA complex disassembly	7.66414e-05	1.85124e-07	0	0	5	91	8	4379	0.625	ASF1, RSC2, LDB7, HTL1, NPL6
GO:0006335	Process	DNA replication-dependent nucleosome assembly	0.0348861	8.4266e-05	0.0012	0.1	3	91	5	4379	0.6	ASF1, RLF2, CAC2
GO:0032958	Process	inositol phosphate biosynthetic process	0.0348861	8.4266e-05	0.0012	0.1	3	91	5	4379	0.6	PLC1, KCS1, ARG82
GO:0034723	Process	DNA replication-dependent nucleosome organization	0.0348861	8.4266e-05	0.0012	0.1	3	91	5	4379	0.6	ASF1, RLF2, CAC2
GO:0043647	Process	inositol phosphate metabolic process	0.0348861	8.4266e-05	0.0012	0.1	3	91	5	4379	0.6	PLC1, KCS1, ARG82
GO:0006283	Process	transcription-coupled nucleotide-excision repair	0.00474802	1.14687e-05	0	0	4	91	8	4379	0.5	HPR1, RPB9, DEF1, SAC3
GO:0007064	Process	mitotic sister chromatid cohesion	7.42383e-05	1.7932e-07	0	0	6	91	14	4379	0.428571	CTF4, ELG1, CTF18, KAR3, CTF8, DCC1
GO:0007062	Process	sister chromatid cohesion	1.45158e-05	3.50623e-08	0	0	7	91	18	4379	0.388889	RSC2, CTF4, ELG1, CTF18, KAR3, CTF8, DCC1
GO:0055029	Component	nuclear DNA-directed RNA polymerase complex	0.0491493	0.000450911	0.0043	0.1	3	91	8	4379	0.375	RPB9, RPB4, RPA12
GO:0016591	Component	DNA-directed RNA polymerase II, holoenzyme	7.65986e-05	7.0274e-07	0	0	6	91	17	4379	0.352941	HPR1, RPB9, TAF14, RPB4, IWR1, PAF1
GO:0043596	Component	nuclear replication fork	0.000964097	8.84493e-06	0	0	5	91	15	4379	0.333333	DIA2, DPB3, CTF4, POL32, CTF18
GO:0005657	Component	replication fork	0.000112987	1.03658e-06	0	0	6	91	18	4379	0.333333	DIA2, RRM3, DPB3, CTF4, POL32, CTF18
GO:0031124	Process	mRNA 3'-end processing	0.000866465	2.09291e-06	0	0	6	91	20	4379	0.3	HPR1, RPB4, PAN3, CTK1, REF2, SAC3
GO:0043044	Process	ATP-dependent chromatin remodeling	0.0132752	3.20658e-05	0	0	5	91	19	4379	0.263158	ASF1, RSC2, BDF1, LDB7, NPL6
GO:0010525	Process	regulation of transposition, RNA-mediated	0.000309924	7.48608e-07	0	0	8	91	38	4379	0.210526	ASF1, CSE2, KCS1, SRB5, SPT21, PAF1, ELG1, ARG82
GO:0010526	Process	negative regulation of transposition, RNA-mediated	0.000309924	7.48608e-07	0	0	8	91	38	4379	0.210526	ASF1, CSE2, KCS1, SRB5, SPT21, PAF1, ELG1, ARG82
GO:0010528	Process	regulation of transposition	0.000309924	7.48608e-07	0	0	8	91	38	4379	0.210526	ASF1, CSE2, KCS1, SRB5, SPT21, PAF1, ELG1, ARG82
GO:0010529	Process	negative regulation of transposition	0.000309924	7.48608e-07	0	0	8	91	38	4379	0.210526	ASF1, CSE2, KCS1, SRB5, SPT21, PAF1, ELG1, ARG82
GO:0006289	Process	nucleotide-excision repair	0.00913288	2.20601e-05	0	0	6	91	29	4379	0.206897	HPR1, RPB9, DEF1, DPB3, POL32, SAC3
GO:0006338	Process	chromatin remodeling	1.95663e-05	4.72616e-08	0	0	10	91	50	4379	0.2	ASF1, RSC2, LDB7, HTL1, CYC8, ARP8, TAF14, BDF1, IWR1, NPL6
GO:0034728	Process	nucleosome organization	0.000698804	1.68793e-06	0	0	8	91	42	4379	0.190476	ASF1, RSC2, LDB7, HTL1, CYC8, RLF2, CAC2, NPL6
GO:0032984	Process	macromolecular complex disassembly	0.00410329	9.91133e-06	0	0	7	91	38	4379	0.184211	ASF1, RSC2, LDB7, REF2, HTL1, RPA12, NPL6
GO:0034623	Process	cellular macromolecular complex disassembly	0.00410329	9.91133e-06	0	0	7	91	38	4379	0.184211	ASF1, RSC2, LDB7, REF2, HTL1, RPA12, NPL6
GO:0006368	Process	RNA elongation from RNA polymerase II promoter	0.019916	4.81064e-05	0.0013	0.1	6	91	33	4379	0.181818	HPR1, RSC2, LDB7, HTL1, PAF1, NPL6
GO:0000781	Component	chromosome, telomeric region	0.00524359	4.81064e-05	0	0	6	91	33	4379	0.181818	EST1, RRM3, GON7, FYV6, BRE2, ELG1
GO:0000070	Process	mitotic sister chromatid segregation	0.00491703	1.18769e-05	0	0	7	91	39	4379	0.179487	CSE2, CTF4, ELG1, CTF18, KAR3, CTF8, DCC1
GO:0006333	Process	chromatin assembly or disassembly	0.00121271	2.92924e-06	0	0	8	91	45	4379	0.177778	ASF1, RSC2, LDB7, HTL1, CYC8, RLF2, CAC2, NPL6
GO:0022411	Process	cellular component disassembly	0.00586012	1.41549e-05	0	0	7	91	40	4379	0.175	ASF1, RSC2, LDB7, REF2, HTL1, RPA12, NPL6
GO:0006354	Process	RNA elongation	0.0282274	6.8182e-05	0.0012	0.1	6	91	35	4379	0.171429	HPR1, RSC2, LDB7, HTL1, PAF1, NPL6
GO:0031123	Process	RNA 3'-end processing	0.0333113	8.04622e-05	0.0012	0.1	6	91	36	4379	0.166667	HPR1, RPB4, PAN3, CTK1, REF2, SAC3
GO:0000819	Process	sister chromatid segregation	0.00962795	2.32559e-05	0	0	7	91	43	4379	0.162791	CSE2, CTF4, ELG1, CTF18, KAR3, CTF8, DCC1
GO:0006366	Process	transcription from RNA polymerase II promoter	2.36367e-06	5.70936e-09	0	0	13	91	80	4379	0.1625	HPR1, RSC2, SRB5, LDB7, REF2, HTL1, PAF1, CSE2, RPB9, RPB4, TAF14, IWR1, NPL6
GO:0006260	Process	DNA replication	2.43917e-05	5.89171e-08	0	0	12	91	80	4379	0.15	ASF1, EST1, RRM3, RAD27, CTF4, POL32, CTF18, CTF8, RNR4, DPB3, ELG1, DCC1
GO:0006351	Process	transcription, DNA-dependent	3.79558e-06	9.16808e-09	0	0	14	91	99	4379	0.141414	HPR1, RSC2, SRB5, LDB7, REF2, HTL1, PAF1, CSE2, RPB9, RPB4, TAF14, IWR1, RPA12, NPL6
GO:0032774	Process	RNA biosynthetic process	3.79558e-06	9.16808e-09	0	0	14	91	99	4379	0.141414	HPR1, RSC2, SRB5, LDB7, REF2, HTL1, PAF1, CSE2, RPB9, RPB4, TAF14, IWR1, RPA12, NPL6
GO:0006397	Process	mRNA processing	0.000537311	1.29785e-06	0	0	11	91	87	4379	0.126437	HPR1, CTK1, PRP18, REF2, DHH1, SWI6, RPB4, BUD31, PAN3, CDC40, SAC3
GO:0007067	Process	mitosis	0.00160945	3.88756e-06	0	0	11	91	97	4379	0.113402	HOF1, CTF4, CTF18, CTF8, CSE2, HSL7, FUS3, ELG1, KAR3, SAC3, DCC1
GO:0000087	Process	M phase of mitotic cell cycle	0.00178231	4.30509e-06	0	0	11	91	98	4379	0.112245	HOF1, CTF4, CTF18, CTF8, CSE2, HSL7, FUS3, ELG1, KAR3, SAC3, DCC1
GO:0000280	Process	nuclear division	0.00197121	4.76138e-06	0	0	11	91	99	4379	0.111111	HOF1, CTF4, CTF18, CTF8, CSE2, HSL7, FUS3, ELG1, KAR3, SAC3, DCC1
GO:0007059	Process	chromosome segregation	0.022604	5.45989e-05	0.0013	0.1	9	91	85	4379	0.105882	RSC2, SCP160, CTF4, CTF18, CTF8, CSE2, ELG1, DCC1, KAR3
