# Supplementary material for: High-Content, Image-Based Screening for Drug Targets in Yeast
Source: PLoS One. 2010 Apr 14;5(4):e10177. doi: 10.1371/journal.pone.0010177 (PMC2854693; doi:10.1371/journal.pone.0010177)
Supplement: Table S3 — A list of parameters identified from concanamycin A-treated cells using Jonckheere-Terpstra tests at FDR = 0.05. The color scheme is the same as that used in Table S1. A) A list of parameters detected at stage A (unbudded cells with one nucleus). B) A list of parameters detected at stage A1B (budded cells with one nucleus). C) A list of parameters detected at stage C (budded cells with two nuclei). D) A list of parameters that represent various cell ratios. (0.04 MB XLS) [file pone.0010177.s003.xls]

## Sheet: TableS2A
NAME	P value	Description	Morphological feature
C104_A	0.00796836	Short axis length in whole cell	Increase of roundness
C115_A	0.00597727	Whole cell axis ratio
C126_A	0.000441459	Brightness difference of cell wall	Decrease of brightness difference of cell wall
CCV11-1_A	0.00690863	Coefficient of variation of C11-1 A	Increase of heterogeneity of cell size
CCV104_A	0.00690863	Coefficient of variation of C104 A
ACV101_A	0.00444611	Coefficient of variation of A101 A	Increase of homogeneity of actin region ratio
D14-1_A	0.00173916	Nuclear size	Increase of nuclear size
D17-1_A	0.000891394	Nuclear fitness for ellipse
D188_A	0.00796836	Distance between nuclear gravity center and brightest point
D182_A	0.000254787	Nuclear axis ratio	Increase of cells with elongated nucleus
D176_A	0.000750197	Nuclear long axis length
D173_A	0.000441459	Maximal distance between nuclear gravity center and nuclear outline
D191_A	0.00917139	Average of nuclear brightness	Decrease of average brightness of nucleus
DCV14-1_A	0.00597727	Coefficient of variation of D14-1 A	Increase of heterogeneity of nuclear size
DCV15-1_A	0.000306681	Coefficient of variation of D15-1 A
DCV16-1_A	0.000891394	Coefficient of variation of D16-1 A
DCV173_A	0.000306681	Coefficient of variation of D173 A
DCV176_A	0.000174718	Coefficient of variation of D176 A
DCV179_A	0.00597727	Coefficient of variation of D179 A
DCV188_A	0.00796836	Coefficient of variation of D188 A
DCV182_A	0.00597727	Coefficient of variation of D182 A	Increase of heterogeneity of nuclear axis ratio
DCV191_A	0.00173916	Coefficient of variation of D191 A	Increase of heterogeneity of average of nuclear brightness

## Sheet: TableS2B
NAME	P value	Description	Morphological feature
C13_A1B	0.00690863	Mother cell fitness for ellipse	Increase of similarity to ellipse
C104_A1B	0.00796836	Short axis length in mother	Increase of mother size
C128_A1B	0.00327934	Distance between middle point of neck and mother hip
C126_A1B	0.00147627	Brightness difference of cell wall	Decrease of brightness difference of cell wall
CCV104_A1B	0.00516059	Coefficient of variation of C104 A1B	Increase of heterogeneity of mother axis ratio
CCV115_A1B	0.000144214	Coefficient of variation of C115 A1B
CCV126_A1B	0.0010569	Coefficient of variation of C126 A1B	Increase of heterogeneity of brightness difference of cell wall
D14-3_A1B	0.00516059	Nuclear size	Increase of nuclear size
D175_A1B	0.00280744	Maximal distance between nuclear gravity center and nuclear outline
D178_A1B	0.00280744	Nuclear long axis length
D181_A1B	0.00917139	Nuclear short axis length
D190_A1B	0.00690863	Distance between nuclear gravity center and brightest point
D17-3_A1B	0.00147627	Nuclear fitness for ellipse	Decrease of similarity to ellipse in nucleus
D16-3_A1B	0.000254787	Maximal intensity of nuclear brightness	Decrease of nuclear brightness
D193_A1B	0.000306681	Average of nuclear brightness
DCV15-3_A1B	0.00917139	Coefficient of variation of D15-3 A1B	Increase of heterogeneity of nuclear brightness
DCV16-3_A1B	0.00917139	Coefficient of variation of D16-3 A1B

## Sheet: TableS2C
NAME	P value	Description	Morphological feature
C104_C	0.00796836	Short axis length in mother	Increase of roundness in mother
C115_C	0.000750197	Mother axis ratio
C116_C	0.00204451	Axis ratio ratio
C126_C	0.00554414	Brightness difference of cell wall	Decrease of brightness difference of cell wall
D17-2_C	0.000306681	Nuclear fitness for ellipse in bud	Increase of similarity to ellipse in bud nuclear
D179_C	0.00204451	Nuclear short axis length in mother	Increase of nuclear short axis length in mother
DCV14-3_C	0.00280744	Coefficient of variation of D14-3 C	Increase of heterogeneity of nuclear size in whole cell
DCV15-3_C	0.00597727	Coefficient of variation of D15-3 C
DCV174_C	0.00597727	Coefficient of variation of D174 C
DCV177_C	0.000630011	Coefficient of variation of D177 C
DCV179_C	0.00917139	Coefficient of variation of D179 C

## Sheet: TableS2D
NAME	P value	Description	Morphological feature
A112	0.00444611	actin bcd ratio	Decrease of cells with actin patches localized in bud
A118	0.00740743	actin e ratio to budded cells	Accumulation of cells with delocalized actin patches in whole cell
D203	0.00515333	nuclear D ratio	Accumulation of cells with abnormal nuclear localization
D207	0.00147627	nuclear A1 ratio to budded cells	Decrease of budded cells with one nucleus
