# Supplementary material for: High-Content, Image-Based Screening for Drug Targets in Yeast
Source: PLoS One. 2010 Apr 14;5(4):e10177. doi: 10.1371/journal.pone.0010177 (PMC2854693; doi:10.1371/journal.pone.0010177)
Supplement: Table S7 — A list of parameters identified from echinocandin B-treated cells using Jonckheere-Terpstra tests at FDR = 0.01. The color scheme is the same as Table S1. A) A list of parameters detected at stage A (unbudded cells with one nucleus). B) A list of parameters detected at stage A1B (budded cells with one nucleus). C) A list of parameters detected at stage C (budded cells with two nuclei). D) A list of parameters that represent various cell ratios. (0.06 MB XLS) [file pone.0010177.s007.xls]

## Sheet: TableS4A
NAME	P value	Description	Morphological feature
C115_A	1.87804e-05	Whole cell axis ratio	Increase of roundness
C13_A	8.00486e-05	Whole cell fitness for ellipse	Deviation from ellipse
C126_A	4.97656e-06	Brightness difference of cell wall	Decrease of brightness difference of cell wall
CCV11-1_A	2.4869e-06	Coefficient of variation of C11-1 A	Increase of heterogenity of cell size
CCV12-1_A	4.97656e-06	Coefficient of variation of C12-1 A
CCV103_A	1.21691e-05	Coefficient of variation of C103 A
CCV104_A	3.95787e-06	Coefficient of variation of C104 A
CCV126_A	3.54197e-05	Coefficient of variation of C126 A
A7-1_A	0.00690863	Size of actin region	Increase of cells with delocalized actin patches
A101_A	0.010534	Actin region ratio in whole cell
ACV101_A	0.000368347	Coefficient of variation of A101 A
A105_A	0.00125044	Actin a ratio
A106_A	0.0010569	Actin b ratio
A113_A	0.00667637	Actin n ratio
ACV123_A	0.00204451	Coefficient of variation of A123 A
D14-1_A	0.000368347	Nuclear size	Increase of nucrear size
D176_A	0.000254787	Nuclear long axis length
D179_A	0.000527943	Nuclear short axis length
D188_A	0.000527943	Distance between nuclear gravity center and brightest point
D15-1_A	0.00690863	Nuclear brightness
D17-1_A	5.34802e-05	Nuclear fitness for ellipse
DCV14-1_A	0.00125044	Coefficient of variation of D14-1 A	Increase of heterogenity of nuclear size
DCV176_A	0.000118777	Coefficient of variation of D176 A
DCV179_A	0.000750197	Coefficient of variation of D179 A
DCV15-1_A	0.000211217	Coefficient of variation of D15-1 A
DCV17-1_A	0.00796836	Coefficient of variation of D17-1 A
DCV194_A	0.00280744	Coefficient of variation of D194 A
D117_A	0.0157628	Distance between nuclear gravity center and cell center	Decrease of distance between nuclear and cell center
DCV117_A	5.34802e-05	Coefficient of variation of D117 A
DCV135_A	8.00486e-05	Coefficient of variation of D135 A
D147_A	0.00516059	Relative distance of nuclear gravity center to cell center
DCV147_A	0.00147627	Coefficient of variation of D147 A
DCV148_A	0.00690863	Coefficient of variation of D148 A
D173_A	0.000306681	Maximal distance between nuclear gravity center and nuclear outline	Increase of distance between nuclear and cell outline
DCV173_A	0.000630011	Coefficient of variation of D173 A
DCV102_A	3.95787e-06	Coefficient of variation of D102 A
DCV127_A	2.4869e-06	Coefficient of variation of D127 A
D182_A	0.00147627	Nuclear axis ratio	Increase of cells with eongated nucleus

## Sheet: TableS4B
NAME	P value	Description	Morphological feature
C115_A1B	2.75495e-07	Mother axis ratio	Increase of roundness of mother
C104_A1B	0.0010569	Short axis length in mother
C11-2_A1B	0.00444611	Bud cell size	Decrease of bud size
C12-2_A1B	0.0010569	Bud cell outline length
C114_A1B	2.4869e-06	Bud axis ratio	Increase of roundness of bud
C107_A1B	0.000368347	Long axis length in bud
C108_A1B	0.0138099	Short axis length in bud
C109_A1B	7.48851e-07	Neck width
C116_A1B	0.000527943	Axis ratio ratio	Decrease of cells with large bud
C117_A1B	0.00173916	Cell outline ratio
C118_A1B	0.00280744	Cell size ratio
C125_A1B	0.00173475	Large bud ratio
C105_A1B	0.00173916	Neck position	Decrease of distance between bud site and mother short axis
C111_A1B	0.00444611	Distance between bud tip and mother short axis extension
C126_A1B	1.51341e-05	Brightness difference of cell wall	Decrease of brightness difference of cell wall
CCV114_A1B	0.00147627	Coefficient of variation of C114 A1B	Increase of heterogeneity of roundness of bud
CCV107_A1B	0.0157628	Coefficient of variation of C107 A1B
CCV109_A1B	0.00204451	Coefficient of variation of C109 A1B
CCV116_A1B	0.00147627	Coefficient of variation of C116 A1B
CCV101_A1B	0.00125044	Coefficient of variation of C101 A1B	Increase of heterogenity of cell size
CCV102_A1B	0.010534	Coefficient of variation of C102 A1B
CCV112_A1B	6.24371e-06	Coefficient of variation of C112 A1B
CCV113_A1B	0.0157628	Coefficient of variation of C113 A1B
CCV128_A1B	9.7635e-06	Coefficient of variation of C128 A1B
CCV126_A1B	9.76149e-05	Coefficient of variation of C126 A1B
CCV115_A1B	0.010534	Coefficient of variation of C115 A1B	Increase of heterogeneity of roundness of mother
CCV103_A1B	0.00125044	Coefficient of variation of C103 A1B
CCV104_A1B	0.000254787	Coefficient of variation of C104 A1B
CCV13_A1B	0.0120738	Coefficient of variation of C13 A1B
CCV105_A1B	0.00597727	Coefficient of variation of C105 A1B	Increase of heterogeneity of budding site and direction
CCV106_A1B	0.00147627	Coefficient of variation of C106 A1B
CCV110_A1B	0.00796836	Coefficient of variation of C110 A1B
CCV111_A1B	3.54197e-05	Coefficient of variation of C111 A1B
CCV11-1_A1B	6.55008e-05	Coefficient of variation of C11-1 A1B	Increase of heterogeneity of bud cell size
CCV12-1_A1B	2.87308e-05	Coefficient of variation of C12-1 A1B
A7-1_A1B	4.97656e-06	Size of actin region in mother	Increase of actin region in mother
ACV7-1_A1B	0.00917139	Coefficient of variation of A7-1 A1B
A8-1_A1B	0.010534	Total brightness of actin region in mother
A103_A1B	6.24371e-06	Relative distance of actin patch center from neck in mother
A7-2_A1B	0.010534	Size of actin region in bud	Decrease of actin region in bud
ACV8-2_A1B	8.00486e-05	Coefficient of variation of A8-2 A1B
A102_A1B	0.000144214	Bud actin region ratio to total region
ACV102_A1B	2.87308e-05	Coefficient of variation of A102 A1B
A109_A1B	2.87308e-05	Actin e ratio	Accumulation of cells with actin delocalized in whole cell
A104_A1B	0.00280744	Relative distance of actin patch center from neck in bud
A112_A1B	5.89626e-05	Actin cd ratio
A113_A1B	0.0067961	Actin n ratio
D14-3_A1B	9.7635e-06	Nuclear size	Increase of nuclear size
D15-3_A1B	0.00280744	Nuclear brightness
D178_A1B	1.96482e-06	Nuclear long axis length
D181_A1B	5.34802e-05	Nuclear short axis length
D175_A1B	2.4869e-06	Maximal distance between nuclear gravity center and nuclear outline
D190_A1B	0.000174718	Distance between nuclear gravity center and brightest point
D17-3_A1B	9.56236e-07	Nuclear fitness for ellipse
D193_A1B	0.00597727	Average of nuclear brightness
D145_A1B	0.00690863	Distance between nuclear outline point D7 and mother hip	Increase of distance between nuclear and neck
D152_A1B	0.0138099	Mobility of nucleus in mother
D132_A1B	0.00597727	Distance between nuclear brightest point and middle point of neck
DCV14-3_A1B	8.00486e-05	Coefficient of variation of D14-3 A1B	Increase of heterogenity of nuclear size
DCV15-3_A1B	0.000368347	Coefficient of variation of D15-3 A1B
DCV181_A1B	6.55008e-05	Coefficient of variation of D181 A1B
DCV175_A1B	0.0138099	Coefficient of variation of D175 A1B
DCV16-3_A1B	0.0120738	Coefficient of variation of D16-3 A1B
DCV193_A1B	0.00796836	Coefficient of variation of D193 A1B
DCV196_A1B	0.010534	Coefficient of variation of D196 A1B
DCV104_A1B	4.35705e-05	Coefficient of variation of D104 A1B	Increase of heterogenity of distance between nuclear and mother tip
DCV107_A1B	0.00444611	Coefficient of variation of D107 A1B
DCV129_A1B	3.54197e-05	Coefficient of variation of D129 A1B
DCV145_A1B	0.0010569	Coefficient of variation of D145 A1B	Increase of heterogenity of distance between nuclear and mother hip
DCV152_A1B	0.00796836	Coefficient of variation of D152 A1B
DCV126_A1B	4.35705e-05	Coefficient of variation of D126 A1B
DCV142_A1B	0.000368347	Coefficient of variation of D142 A1B
DCV132_A1B	0.000254787	Coefficient of variation of D132 A1B	Increae of heterogenity of distance between nuclear and neck
DCV110_A1B	0.000750197	Coefficient of variation of D110 A1B
DCV114_A1B	0.00690863	Coefficient of variation of D114 A1B
DCV143_A1B	0.00327934	Coefficient of variation of D143 A1B
DCV118_A1B	0.00147627	Coefficient of variation of D118 A1B	Increase of heterogenity of distance between nuclear and mother center
DCV147_A1B	0.00125044	Coefficient of variation of D147 A1B
DCV169_A1B	0.0138099	Coefficient of variation of D169 A1B
D184_A1B	0.000144214	Nuclear axis ratio	Increase of cells with elongated nucleus

## Sheet: TableS4C
NAME	P value	Description	Morphological feature
C11-1_C	0.00444611	Mother cell size	Increase of mother size
C109_C	3.54916e-07	Neck width
C12-2_C	0.00327934	Bud cell outline length	Decrease of bud size
C115_C	9.56236e-07	Mother axis ratio	Increase of roundness in mother
C104_C	0.000306681	Short axis length in mother
C107_C	0.0010569	Long axis length in bud	Increase of roundness in bud
C114_C	4.35705e-05	Bud axis ratio
C117_C	1.54892e-06	Cell outline ratio	Decrease of cells with large bud
C118_C	3.95787e-06	Cell size ratio
C125_C	7.48851e-07	Large bud ratio
C124_C	7.48851e-07	Medium bud ratio	Accumulation of cells with medium bud
C126_C	4.35705e-05	Brightness difference of cell wall	Decrease of brightness difference of cell wall
CCV11-1_C	0.000368347	Coefficient of variation of C11-1 C	Increase of heterogenity of mother size
CCV12-1_C	0.000368347	Coefficient of variation of C12-1 C
CCV104_C	8.00486e-05	Coefficient of variation of C104 C
CCV112_C	0.000118777	Coefficient of variation of C112 C
CCV128_C	8.00486e-05	Coefficient of variation of C128 C
CCV13_C	0.00147627	Coefficient of variation of C13 C
CCV11-2_C	0.00516059	Coefficient of variation of C11-2 C	Increase of heterogenity of bud size
CCV12-2_C	0.000527943	Coefficient of variation of C12-2 C
CCV107_C	0.000630011	Coefficient of variation of C107 C
CCV110_C	0.00917139	Coefficient of variation of C110 C
CCV113_C	9.76149e-05	Coefficient of variation of C113 C
CCV101_C	0.00239834	Coefficient of variation of C101 C	Increase of heterogenity of cell size
CCV102_C	0.00125044	Coefficient of variation of C102 C
CCV105_C	0.00917139	Coefficient of variation of C105 C	Increase of heterogenity of neck position
CCV106_C	0.0120738	Coefficient of variation of C106 C	Increase of heterogenity of bud direction
CCV117_C	0.00173916	Coefficient of variation of C117 C	Increase of heterogenity of cell size ratio
CCV118_C	0.00280744	Coefficient of variation of C118 C
CCV126_C	0.000630011	Coefficient of variation of C126 C	Incrase of heterogenity of brightness difference of cell wall
A7-1_C	0.010534	Size of actin region in mother	Increase of actin region size in mother
A8-1_C	0.000527943	Total brightness of actin region in mother
A7-2_C	0.000441459	Size of actin region in bud	Decrease of actin region size in bud
A8-2_C	0.00516059	Total brightness of actin region in bud
A102_C	0.000254787	Bud actin region ratio to total region
A104_C	0.000118777	Relative distance of actin patch center from neck in bud
A112_C	9.72417e-05	Actin cd ratio	Dcrease of actin localization in bud
A108_C	0.000144214	Actin d ratio
A110_C	0.00068564	Actin f ratio	Increase of actin localization at neck
ACV122_C	0.0157628	Coefficient of variation of A122 C	Increase of heterogenity of bright actin patches
D14-1_C	6.55008e-05	Nuclear size in mother	Increase of nuclear size in mother
D176_C	0.0010569	Nuclear long axis length in mother
D179_C	3.54197e-05	Nuclear short axis length in mother
D15-1_C	0.0010569	Nuclear brightness in mother
D17-1_C	0.000254787	Nuclear fitness for ellipse in mother
D173_C	0.000368347	Maximal distance between nuclear gravity center and nuclear outline in mother
D14-2_C	0.000750197	Nuclear size in bud	Increase of nuclear size in bud
D177_C	0.000306681	Nuclear long axis length in bud
D180_C	0.00597727	Nuclear short axis length in bud
D17-2_C	0.0138099	Nuclear fitness for ellipse in bud
D174_C	0.000306681	Maximal distance between nuclear gravity center and nuclear outline in bud
D14-3_C	0.000118777	Nuclear size in whole cell	Increase of nuclear size in whole cell
D15-3_C	0.010534	Nuclear brightness in whole cell
D103_C	0.0157628	Distance between nuclear gravity center in mother and mother tip	Increase of distance between nuclear in mother and mother tip
D128_C	0.0138099	Distance between nuclear brightest point in mother and mother tip
D147_C	0.00917139	Relative distance of nuclear gravity center in mother to mother center
D109_C	0.0010569	Distance between nuclear gravity center in bud and middle point of neck	Decrease of distance between nuclear in bud and neck
D131_C	0.000174718	Distance between nuclear brightest point in bud and middle point of neck
D144_C	0.000368347	Distance between nuclear outline point D6-2 in bud and middle point of neck
D119_C	0.0120738	Distance between nuclear gravity center in bud and bud center
D116_C	0.00280744	Distance between two nuclear gravity centers	Decrease of distance between two nuclei
D134_C	0.00382246	Distance between two nuclear brightest points
D197_C	0.0157628	Ratio of nuclear size	Decrease of nuclear size ratio of bud to mother
DCV14-1_C	0.010534	Coefficient of variation of D14-1 C	Increase of heterogenity of nuclear size in mother
DCV15-1_C	0.00382246	Coefficient of variation of D15-1 C
DCV179_C	0.0120738	Coefficient of variation of D179 C
DCV15-2_C	0.0120738	Coefficient of variation of D15-2 C	Increase of heterogenity of nuclear size in bud
DCV177_C	0.00690863	Coefficient of variation of D177 C
DCV174_C	0.00125044	Coefficient of variation of D174 C
DCV14-3_C	0.00597727	Coefficient of variation of D14-3 C	Increase of heterogenity of nuclear size in whole cell
DCV15-3_C	0.00327934	Coefficient of variation of D15-3 C
DCV17-1_C	0.00690863	Coefficient of variation of D17-1 C
DCV185_C	0.00690863	Coefficient of variation of D185 C
DCV186_C	0.00204451	Coefficient of variation of D186 C
DCV117_C	0.00327934	Coefficient of variation of D117 C	Increase of heterogenity of nuclear localization
DCV130_C	0.00690863	Coefficient of variation of D130 C
DCV135_C	0.00516059	Coefficient of variation of D135 C
DCV147_C	0.010534	Coefficient of variation of D147 C
DCV197_C	0.000630011	Coefficient of variation of D197 C	Increase of heterogenity of nuclear size ratio
DCV198_C	0.00125044	Coefficient of variation of D198 C

## Sheet: TableS4D
NAME	P value	Description	Morphological feature
C121	0.010534	medium bud ratio	Accumulation of cells with medium bud
C124	0.0010569	medium bud ratio to buded cells
A112	4.56222e-07	actin bcd ratio	Decrease of cells with localized actin patches at bud and bud site
A115	0.00125044	actin b ratio to no bud cells
A106	0.0138099	actin b ratio
A116	2.87308e-05	actin c ratio to budded cells
A107	0.00796836	actin c ratio
A117	0.00796836	actin d ratio to budded cells
A114	0.00125044	actin a ratio to no bud cells	Accumulation of cells with delocalized actin patches
A111	0.000306681	actin ae ratio
A118	4.35705e-05	actin e ratio to budded cells
A109	8.00486e-05	actin e ratio
A119	1.21691e-05	actin f ratio to budded cells	Accumulation of cells with localized actin patches at neck
A110	6.55008e-05	actin f ratio
A113	0.011631	actin n ratio	Accumulation of cells without actin patches
D206	0.0022972	nuclear A ratio to no bud cells	Decrease of cells with one nucleus
D207	2.4869e-06	nuclear A1 ratio to budded cells
D214	6.24371e-06	nuclear A1 ratio to nuclear A1BC cells
D211	0.0010569	nuclear A1 ratio to nuclear AA1BC cells
D200	0.000750197	nuclear A1 ratio
D215	0.0157628	nuclear B ratio to nuclear A1BC cells	Accumulation of budded cells with one nucleus at neck
D209	1.51341e-05	nuclear C ratio to budded cells	Accumulation of budded cells with two nuclei
D213	0.000306681	nuclear C ratio to nuclear AA1BC cells
D202	0.000441459	nuclear C ratio
D216	4.97656e-06	nuclear C ratio to nuclear A1BC cells
D203	0.000134051	nuclear D ratio	Accumulation of cells with abnormal nuclear localization
D204	0.000189551	nuclear E ratio
D205	0.0149631	nuclear F ratio
