# Supplementary material for: High-Content, Image-Based Screening for Drug Targets in Yeast
Source: PLoS One. 2010 Apr 14;5(4):e10177. doi: 10.1371/journal.pone.0010177 (PMC2854693; doi:10.1371/journal.pone.0010177)
Supplement: Table S8 — A list of GO terms enriched in the top 100 genes ranked by the high-content image-based profiling for echinocandin B treatment. Of the 4718 genes, 4379 genes were associated to at least one GO term, in which 84 of top 100 genes ranked by high-content image-profiling for echinocandin B were included. Using the GO term finder (see Materials and Methods), significant enrichment of 52 GO terms was detected at P<0.05 with the Bonferroni correction (Corrected P-value column) among the 84 genes from 4379 genes, and GO terms associated with 100 and fewer genes in the 4379 genes (Number of annotations in the 4718 genes column) were listed. (0.03 MB XLS) [file pone.0010177.s008.xls]

## Sheet: Sheet1
GOID	Category	GO term	Corrected P-value	Uncorrected P-value	FDR	Expected false positives	Number of annotations in the 84 genes	Number of annotated genes in the top 100 genes	Number of annotations in the 4379 genes	Number of annotated genes in the 4718 genes	Ratio of annotations	The genes annotated to the node
GO:0046961	Function	proton-transporting ATPase activity, rotational mechanism	2.09265e-06	1.993e-08	0	0	7	84	18	4379	0.388889	VMA5, VMA7, VMA6, CUP5, ATP15, VMA4, RAV1
GO:0000009	Function	alpha-1,6-mannosyltransferase activity	0.0373604	0.000355813	0	0	3	84	8	4379	0.375	OCH1, MNN10, ANP1
GO:0016471	Component	vacuolar proton-transporting V-type ATPase complex	3.57416e-05	2.85933e-07	0	0	6	84	16	4379	0.375	VMA5, VMA7, VMA6, CUP5, VMA4, RAV1
GO:0033176	Component	proton-transporting V-type ATPase complex	3.57416e-05	2.85933e-07	0	0	6	84	16	4379	0.375	VMA5, VMA7, VMA6, CUP5, VMA4, RAV1
GO:0019829	Function	cation-transporting ATPase activity	1.05394e-05	1.00375e-07	0	0	7	84	22	4379	0.318182	VMA5, VMA7, VMA6, CUP5, ATP15, VMA4, RAV1
GO:0033178	Component	proton-transporting two-sector ATPase complex, catalytic domain	0.00987344	7.89875e-05	0	0	4	84	13	4379	0.307692	VMA5, VMA7, ATP15, VMA4
GO:0015985	Process	energy coupled proton transport, down electrochemical gradient	0.00145967	3.23651e-06	0	0	6	84	23	4379	0.26087	VMA5, VMA7, VMA6, CUP5, ATP15, VMA4
GO:0015986	Process	ATP synthesis coupled proton transport	0.00145967	3.23651e-06	0	0	6	84	23	4379	0.26087	VMA5, VMA7, VMA6, CUP5, ATP15, VMA4
GO:0007035	Process	vacuolar acidification	0.00191653	4.24952e-06	0	0	6	84	24	4379	0.25	VMA5, VMA7, VMA6, CUP5, VMA4, RAV1
GO:0045851	Process	pH reduction	0.00191653	4.24952e-06	0	0	6	84	24	4379	0.25	VMA5, VMA7, VMA6, CUP5, VMA4, RAV1
GO:0051452	Process	intracellular pH reduction	0.00191653	4.24952e-06	0	0	6	84	24	4379	0.25	VMA5, VMA7, VMA6, CUP5, VMA4, RAV1
GO:0016469	Component	proton-transporting two-sector ATPase complex	0.000103009	8.24068e-07	0	0	7	84	29	4379	0.241379	VMA5, VMA7, VMA6, CUP5, ATP15, VMA4, RAV1
GO:0030641	Process	regulation of cellular pH	0.00248329	5.50619e-06	0	0	6	84	25	4379	0.24	VMA5, VMA7, VMA6, CUP5, VMA4, RAV1
GO:0051453	Process	regulation of intracellular pH	0.00248329	5.50619e-06	0	0	6	84	25	4379	0.24	VMA5, VMA7, VMA6, CUP5, VMA4, RAV1
GO:0042625	Function	ATPase activity, coupled to transmembrane movement of ions	0.000141326	1.34597e-06	0	0	7	84	31	4379	0.225806	VMA5, VMA7, VMA6, CUP5, ATP15, VMA4, RAV1
GO:0006818	Process	hydrogen transport	0.00504467	1.11855e-05	0	0	6	84	28	4379	0.214286	VMA5, VMA7, VMA6, CUP5, ATP15, VMA4
GO:0006885	Process	regulation of pH	0.00504467	1.11855e-05	0	0	6	84	28	4379	0.214286	VMA5, VMA7, VMA6, CUP5, VMA4, RAV1
GO:0015992	Process	proton transport	0.00504467	1.11855e-05	0	0	6	84	28	4379	0.214286	VMA5, VMA7, VMA6, CUP5, ATP15, VMA4
GO:0030004	Process	cellular monovalent inorganic cation homeostasis	0.0137347	3.04538e-05	0	0	6	84	33	4379	0.181818	VMA5, VMA7, VMA6, CUP5, VMA4, RAV1
GO:0006754	Process	ATP biosynthetic process	0.0164238	3.64164e-05	0	0	6	84	34	4379	0.176471	VMA5, VMA7, VMA6, CUP5, ATP15, VMA4
GO:0046034	Process	ATP metabolic process	0.0164238	3.64164e-05	0	0	6	84	34	4379	0.176471	VMA5, VMA7, VMA6, CUP5, ATP15, VMA4
GO:0009144	Process	purine nucleoside triphosphate metabolic process	0.0230673	5.1147e-05	0	0	6	84	36	4379	0.166667	VMA5, VMA7, VMA6, CUP5, ATP15, VMA4
GO:0009145	Process	purine nucleoside triphosphate biosynthetic process	0.0230673	5.1147e-05	0	0	6	84	36	4379	0.166667	VMA5, VMA7, VMA6, CUP5, ATP15, VMA4
GO:0009205	Process	purine ribonucleoside triphosphate metabolic process	0.0230673	5.1147e-05	0	0	6	84	36	4379	0.166667	VMA5, VMA7, VMA6, CUP5, ATP15, VMA4
GO:0009206	Process	purine ribonucleoside triphosphate biosynthetic process	0.0230673	5.1147e-05	0	0	6	84	36	4379	0.166667	VMA5, VMA7, VMA6, CUP5, ATP15, VMA4
GO:0034220	Process	ion transmembrane transport	0.0230673	5.1147e-05	0	0	6	84	36	4379	0.166667	VMA5, VMA7, VMA6, CUP5, ATP15, VMA4
GO:0055067	Process	monovalent inorganic cation homeostasis	0.0230673	5.1147e-05	0	0	6	84	36	4379	0.166667	VMA5, VMA7, VMA6, CUP5, VMA4, RAV1
GO:0015078	Function	hydrogen ion transmembrane transporter activity	0.000278023	2.64783e-06	0	0	8	84	48	4379	0.166667	VMA6, CUP5, ATP15, VMA4, VMA5, QCR2, VMA7, RAV1
GO:0015077	Function	monovalent inorganic cation transmembrane transporter activity	0.00038343	3.65171e-06	0	0	8	84	50	4379	0.16	VMA6, CUP5, ATP15, VMA4, VMA5, QCR2, VMA7, RAV1
GO:0009142	Process	nucleoside triphosphate biosynthetic process	0.0317064	7.03024e-05	0	0	6	84	38	4379	0.157895	VMA5, VMA7, VMA6, CUP5, ATP15, VMA4
GO:0009199	Process	ribonucleoside triphosphate metabolic process	0.0317064	7.03024e-05	0	0	6	84	38	4379	0.157895	VMA5, VMA7, VMA6, CUP5, ATP15, VMA4
GO:0009201	Process	ribonucleoside triphosphate biosynthetic process	0.0317064	7.03024e-05	0	0	6	84	38	4379	0.157895	VMA5, VMA7, VMA6, CUP5, ATP15, VMA4
GO:0006119	Process	oxidative phosphorylation	0.00979251	2.17129e-05	0	0	7	84	46	4379	0.152174	QCR2, VMA5, VMA7, VMA6, CUP5, ATP15, VMA4
GO:0015672	Process	monovalent inorganic cation transport	0.0493193	0.000109355	0	0	6	84	41	4379	0.146341	VMA5, VMA7, VMA6, CUP5, ATP15, VMA4
GO:0016820	Function	hydrolase activity, acting on acid anhydrides, catalyzing transmembrane movement of substances	0.00519275	4.94548e-05	0	0	7	84	52	4379	0.134615	VMA5, VMA7, VMA6, CUP5, ATP15, VMA4, RAV1
GO:0042626	Function	ATPase activity, coupled to transmembrane movement of substances	0.00519275	4.94548e-05	0	0	7	84	52	4379	0.134615	VMA5, VMA7, VMA6, CUP5, ATP15, VMA4, RAV1
GO:0015399	Function	primary active transmembrane transporter activity	0.00751901	7.16096e-05	0	0	7	84	55	4379	0.127273	VMA5, VMA7, VMA6, CUP5, ATP15, VMA4, RAV1
GO:0015405	Function	P-P-bond-hydrolysis-driven transmembrane transporter activity	0.00751901	7.16096e-05	0	0	7	84	55	4379	0.127273	VMA5, VMA7, VMA6, CUP5, ATP15, VMA4, RAV1
GO:0043492	Function	ATPase activity, coupled to movement of substances	0.00846115	8.05824e-05	0	0	7	84	56	4379	0.125	VMA5, VMA7, VMA6, CUP5, ATP15, VMA4, RAV1
GO:0022890	Function	inorganic cation transmembrane transporter activity	0.0400838	0.00038175	0.0043	0.06	8	84	94	4379	0.0851064	VMA6, CUP5, ATP15, VMA4, VMA5, QCR2, VMA7, RAV1
